# Supplementary material for: Causal Effect of Selenium Levels on Osteoporosis: A Mendelian Randomization Study
Source: MDPI journal article supplement (doi:10.3390/nu15245065), 2023-12-11
Supplement: s1 [file s1]

## **Contents**

**Supplementary Figure S1.** Odds ratio plot of selenium levels with OP and BMD from the second MR analysis.

**Supplementary Figure S2.** Forest plots of leave-one-out analyses of the causal effect of selenium levels on OP and BMD from the second MR analysis.

**Supplementary Figure S3.** Funnel plots of the causal effect of selenium levels on OP and BMD from the second MR analysis.

**Supplementary Table S1.** Heterogeneity and pleiotropy test from the second MR analysis.

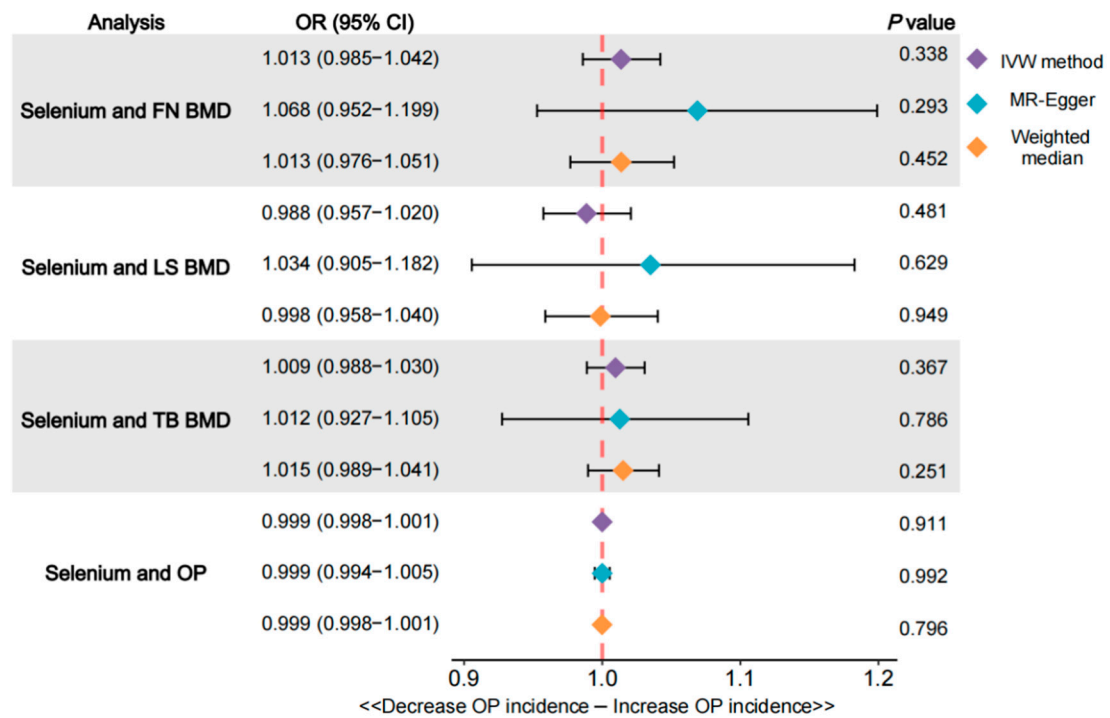

**Supplementary Figure S1.** Odds ratio plot of selenium levels with OP and BMD from the second MR analysis. OR, odds ratio; FN BMD, femoral neck bone mineral density; LS BMD, lumbar spine bone mineral density; TB BMD, total body bone mineral density; OP, osteoporosis; IVW, inverse variance weighted.

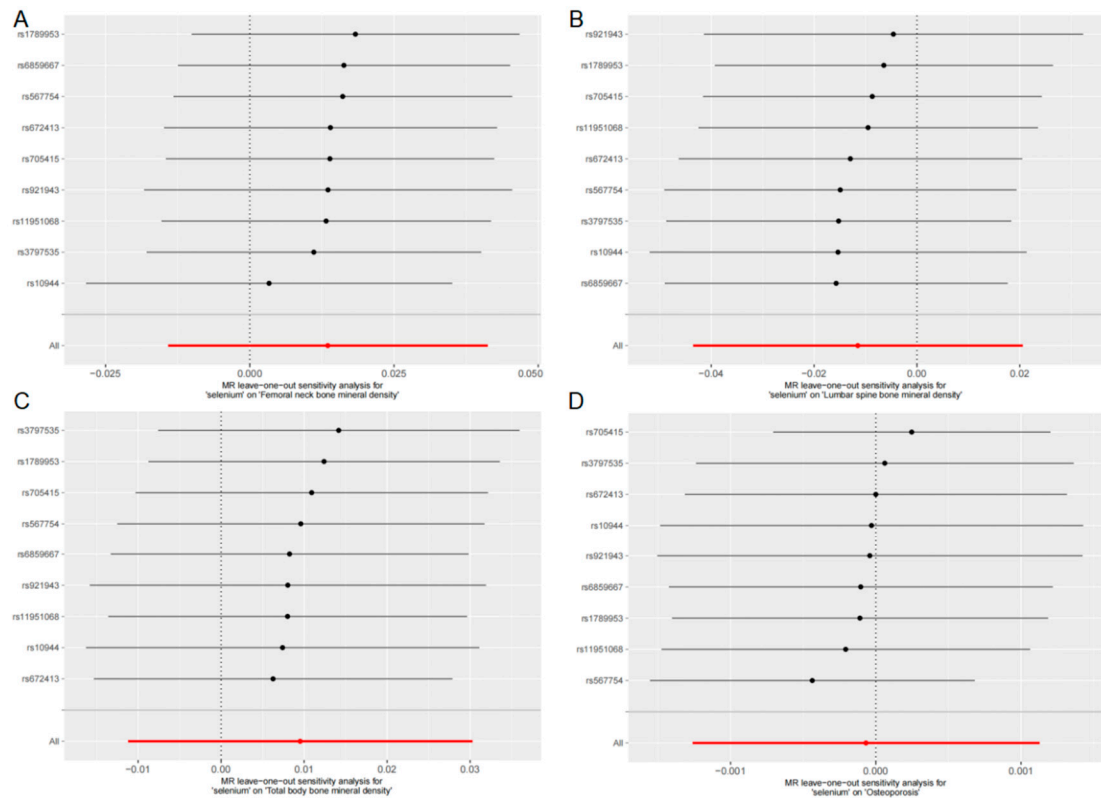

**Supplementary Figure S2.** Forest plots of leave-one-out analyses of the causal effect of selenium levels on OP and BMD from the second MR analysis (A) FN BMD; (B) LS BMD; (C) TB BMD; (D) OP.

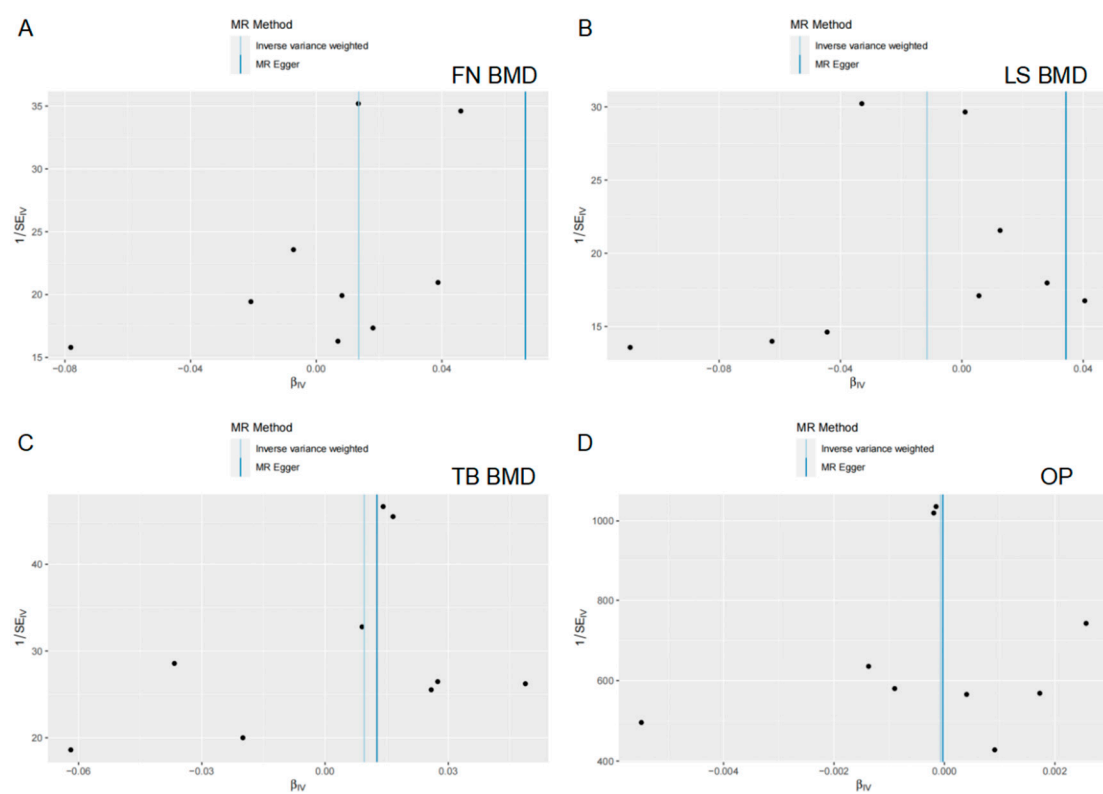

**Supplementary Figure S3.** Funnel plots of the causal effect of selenium levels on OP and BMD from the second MR analysis (A) FN BMD; (B) LS BMD; (C) TB BMD; (D) OP.

| Exposure  | Outcome | Heterogeneity test |       | Heterogeneity test |       | Pleiotropy test |       |
|-----------|---------|--------------------|-------|--------------------|-------|-----------------|-------|
|           |         | MR Egger           |       | IVW                |       | MR Egger        |       |
|           |         | Q                  | P     | Q                  | P     | Intercept       | P     |
| Se levels | FN BMD  | 3.485              | 0.836 | 4.355              | 0.823 | -0.012          | 0.382 |
| Se levels | LS BMD  | 4.203              | 0.756 | 4.683              | 0.790 | -0.011          | 0.510 |
| Se levels | TB BMD  | 5.455              | 0.604 | 5.460              | 0.707 | 0.000           | 0.945 |
| Se levels | OP      | 13.276             | 0.065 | 13.277             | 0.102 | 0.000           | 0.988 |

**Supplementary Table S1.** Heterogeneity and pleiotropy test from the second MR analysis.
